# Supplementary material for: Outcomes from stereotactic surgery for essential tremor
Source: PubMed Central journal article supplement — J Neurol Neurosurg Psychiatry. 2018 Oct 18;90(4):474–82. doi: 10.1136/jnnp-2018-318240 (PMC6581115; doi:10.1136/jnnp-2018-318240), 2018-10-18
Supplement: jnnp-2018-318240supp001.pdf [file jnnp-2018-318240supp001.pdf]

**Supplemental Table 1: Summary of DBS studies**

| Study                        | Patients (N) | Target      | Bilateral vs. Unilateral   | Tremor reduction (%)           | Upper Extremity Tremor Reduction (%) | ADLs  | Follow Up (months) |
|------------------------------|--------------|-------------|----------------------------|--------------------------------|--------------------------------------|-------|--------------------|
| Alfonso et al 2010           | 11           | VIM         | Bilateral                  | 70.6%                          |                                      |       | 24.7+/-20.3        |
| Baizabal-Carvalho et al 2013 | 13           | VIM         | Unilateral 6, Bilateral 7  | 47.5%                          | 27%                                  | 31.7% | 132.54 ±15.3       |
| Blomstedt et al 2007         | 19           | VIM         | Unilateral                 | 39.3%                          | 60.3%                                | 32.3% | 86±9               |
| Blomstedt et al 2010         | 21           | PSA         | Unilateral 19, Bilateral 2 | 95%                            | 87%                                  | 66%   | 12                 |
| Blomstedt et al 2011         | 34           | VIM         | Unilateral 31, Bilateral 3 | 49%                            | 70%                                  | 53.8% | 28±24              |
| Blomstedt et al 2011         | 34           | PSA/cZI     | Unilateral 31, Bilateral 3 | 62%                            | 89%                                  | 66.1% | 12                 |
| Blomstedt et al 2012         | 5            | PSA/cZI     | Unilateral 5               | 57%                            | 20%                                  |       | 12-24              |
| Bryant et al 2003            | 16           | VIM         | Unilateral 12, Bilateral 4 | 33.90%                         |                                      | 44%   | 13                 |
| Chang et al 2012             | 5            | VIM and PSA | Bilateral 5                | 57.70%                         |                                      |       | 18.2±5.4           |
| Cury et al 2017              | 38           | VIM         | Unilateral 3, Bilateral 35 | 66% at 1 year, 48% at 10 years |                                      |       | 8.1+/-4.8          |
| de Oliviera et al 2012       | 26           | VIM         | Unilateral 19, Bilateral   | 57.1%                          |                                      | 53.8% | 41                 |

|                         |    |     |                            |                                    |                                   |       |                   |
|-------------------------|----|-----|----------------------------|------------------------------------|-----------------------------------|-------|-------------------|
|                         |    |     | 7                          |                                    |                                   |       |                   |
| Favilla et al 2012      | 28 | VIM | Unilateral 19, Bilateral 9 | 22%                                |                                   |       | 36                |
| Fytagoridis et al 2010  | 27 | PSA |                            | 91.0%                              |                                   |       | 34                |
| Fytagoridis et al 2012  | 18 | cZI | Unilateral 16, Bilateral 2 | 52.4%                              | 78%                               | 65.8% | 48.5+/-10.6       |
| Graf-Radford et al 2010 | 31 | VIM | Unilateral 22, bilateral 9 | 53.4% unilateral, 77.8% bilateral  | 38.2% unilateral, 66.0% bilateral |       | 6                 |
| Hagglund et al 2015     | 26 | cZI | Unilateral 19, Bilateral 7 | 50% patients improved voice tremor |                                   |       | 54.2±31.1         |
| Hamel et al 2007        | 8  | PSA | Bilateral                  | 80%                                |                                   |       | At least 3 months |
| Hariz et al 2008        | 19 | VIM | Unilateral, Bilateral      | 47.4%                              |                                   |       | 88±11             |
| Herzog et al 2007       | 10 | cZI | Bilateral                  | 64.2±4.4%                          |                                   |       | 6-41              |
| Husset al 2015          | 70 | VIM | Unilateral 13              | 62.8%                              | 78.9%                             |       | 8.6               |
| Husset al 2015          | 70 | VIM | Bilateral 57               | 79.5%                              | 68.5-74.5%                        |       | 13.1              |
| Kumar et al 2006        | 5  | VIM | Unilateral                 | 62.0%                              |                                   |       | 55.2              |
| Koller et al 1999       | 38 | VIM | Unilateral                 | All patients improved head tremor  |                                   |       | 12                |
| Koller et al 2001       | 49 | VIM | Unilateral                 | 78.5%                              |                                   |       | 40.2±14.7         |
| Lee et al 2005          | 18 | VIM | Unilateral                 | 75.8%                              | 64.3%                             |       | 27                |
| Lyons et al 1998        | 22 | VIM | Unilateral 22              | 39.3%                              |                                   | 57.9% | 11                |
| Mandat et al 2011       | 18 | VIM | Unilateral 7, Bilateral 11 | 79.0%                              |                                   | 61.0% | 3                 |

|                          |    |     |                             |                                         |                                     |                                         |                  |
|--------------------------|----|-----|-----------------------------|-----------------------------------------|-------------------------------------|-----------------------------------------|------------------|
| Murata et al 2003        | 8  | cZI | Unilateral                  | 81.0%                                   |                                     |                                         | 8-42             |
| Nazzaro et al 2012       | 91 | VIM | Unilateral                  | 55% at 1 year, 31% at 9 years           |                                     | 73% at 1 year, 36.9% at 9 years         | 84 (up to 108)   |
| Ondo et al 2001          | 22 | VIM | Unilatera 11, Bilateral 11  | 38% Unilateral, 65% Bilateral           |                                     |                                         | 3                |
| Pahwa et al 2006         | 26 | VIM | Unilateral 18, Bilateral 8  | 46% (5 years) Unilateral, 78% bilateral | 75% unilateral, 65% left, 86% right | 51% (5 years)-unilateral; 36% bilateral | 60               |
| Papavassiliou et al 2003 | 37 | VIM | Unilateral 21, Bilateral 16 | 53+/-36%                                |                                     |                                         | 26+/-16.2        |
| Pedrosa et al 2014       | 17 | VIM | Bilateral                   | 71%                                     |                                     |                                         |                  |
| Peng-Chen et al 2013     | 22 | VIM | Unilateral                  | 56%                                     |                                     | 67%                                     | 3.4+/-0.14 years |
| Pilitsis et al 2008      | 26 | VIM | Unilateral 22, Bilateral 4  | 75.3%                                   | 73.8%                               |                                         | 40+/-17 months   |
| Plaha et al 2004         | 4  | PSA | Bilateral                   | 80.1%                                   | 68.0%                               | 88.8%                                   | 12               |
| Plaha et al 2008         | 6  | cZI | Bilateral                   | 75.9%                                   |                                     |                                         | 12               |
| Plaha et al 2011         | 15 | cZI | Bilateral                   | 73.8%                                   | 60.10%                              | 80%                                     | 31.7+/-28.6      |
| Obwegeser et al 2000     | 27 | VIM | Unilateral 14, Bilateral 13 | 82% Unilateral,                         |                                     |                                         | 12 months        |
| Rehncrona et al 2003     | 19 | VIM | Unilateral 17, Bilateral 2  | 43%                                     | 56%                                 |                                         | 6.5+/-0.3 years  |
| Sandvik et al 2012       | 19 | PSA | Unilateral 17, Bilateral    | 58%                                     | 88%                                 | 71%                                     | 12               |

|                       |    |     |                                   |        |        |        |                     |
|-----------------------|----|-----|-----------------------------------|--------|--------|--------|---------------------|
|                       |    |     | 2                                 |        |        |        |                     |
| Sandvik et al<br>2012 | 17 | VIM | Unilateral<br>15, Bilateral<br>2  | 48%    | 57%    |        | 66                  |
| Sydow et al<br>2003   | 19 | VIM | Unilateral<br>12, Bilateral<br>7  | 46.40% | 36.00% | 51.70% | 6.53+/-0.6<br>years |
| Taha et al 1999       | 15 | VIM | Bilateral                         |        |        |        | 10                  |
| Zhang et al<br>2010   | 34 | VIM | Unilateral<br>23, Bilateral<br>11 | 80.4%  | 69.7%  |        | 56.9                |

**Supplemental TABLE 2: Summary of complications from DBS**

| Study                        | Target         | Speech | Dysarthria       | Dysphasia | Hypophonia | Paresthesia | Ataxia       | Hemiparesis | Other Complications        |
|------------------------------|----------------|--------|------------------|-----------|------------|-------------|--------------|-------------|----------------------------|
| Alomar et al 2016            | VIM Unilateral | 12.30% | 11.00%           | 9.90%     | 5%         |             |              |             |                            |
| Alomar et al 2016            | VIM Bilateral  | 41.4%  | 39.2%            | 18.8%     | 18.8%      |             |              |             |                            |
| Baizabal-Carvalho et al 2013 | VIM            |        | 33.3<br>57.1     |           |            |             | 16.7<br>85.7 |             | 23% hardware complications |
| Barbe et al 2014             | VIM            |        | 10/26<br>(38.5%) |           |            |             |              |             |                            |
| Blomstedt et al 2010         | PSA            |        | 38.1% transient  |           |            |             |              |             |                            |
| Chandran et al 2017          | PSA            |        |                  |           |            |             |              |             | 83.3% dystonic tics        |
| Earhart et al 2009           | VIM            |        |                  |           |            |             | 33%          |             |                            |

|                        |     |      |       |     |  |     |      |                |                                                              |
|------------------------|-----|------|-------|-----|--|-----|------|----------------|--------------------------------------------------------------|
| Fytagoridis et al 2010 | PSA |      |       | 22% |  |     |      | 3.7% transient |                                                              |
| Gilard et al 2014      | VIM |      |       |     |  |     |      |                | Dysgeusia                                                    |
| Kumar et al 2006       | VIM |      |       |     |  |     |      |                | 40% developed tolerancd to DBS at 3 or 12 months             |
| Matsumoto et al 2016   | VIM |      | 22%   |     |  |     |      |                |                                                              |
| Nandi et al 2004       | PSA |      | 16.7% |     |  |     |      | 16.7%          | 16.7% Seizure                                                |
| Pahwa et al 2006       | VIM |      | 75%   |     |  | 45% | 56%  |                |                                                              |
| Peng-Chen et al 2013   | VIM | 4.5% |       |     |  |     | 9.1% | 4.5%           | 9.1% mental decline, 4.5% air embolus, 4.5% mania/ hypomania |

|                     |     |  |  |  |  |      |  |  |                                                |
|---------------------|-----|--|--|--|--|------|--|--|------------------------------------------------|
| Zhang et al<br>2010 | VIM |  |  |  |  | 5.9% |  |  | 23.5%<br>hardware-<br>related<br>complications |
|---------------------|-----|--|--|--|--|------|--|--|------------------------------------------------|

**Supplemental TABLE 3: Studies reporting results radiofrequency thalamotomy for essential tremor**

| <b>Study</b>        | <b>Patients (N)</b>       | <b>Level of Evidence</b> | <b>Target</b> | <b>Follow up time</b> | <b>Tremor reduction (%)</b>                                                                               |
|---------------------|---------------------------|--------------------------|---------------|-----------------------|-----------------------------------------------------------------------------------------------------------|
| Nagaseki Y, 1986    | 43 total<br>16 ET         | 4                        | Vim thalamus  | Average 6.6 years     | 90.9% tremor free,<br>one pt underwent reoperation                                                        |
| Mohadjer, 1990      | 65                        | 4                        | Vim thalamus  | Average 8.6 years     | 69% tremor free<br>11.9% moderate tremor                                                                  |
| Goldman MS, 1992    | 8                         | 4                        | VL thalamus   | 1-50 months           | Grade 0: 4 pts<br>Grade 1: 3 pts<br><br>Disability: 21.1 to 3.9                                           |
| Shahzadi, 1995      | 22                        | 4                        | Vim thalamus  | 3 months-5 years      | 62% tremor free<br>86% significantly reduced                                                              |
| Jankovic J, 1995    | 60 total<br>6 ET          | 4                        | Vim thalamus  | 53.4 month, mean      | 83% of patients moderate-marked improvement                                                               |
| Tasker RR, 1998     | 45 total<br>6 ET patients | 4                        | Vim thalamus  | 3-6 months            | All patients:<br>RF: 69% responders<br>DBS: 79% responders                                                |
| Akbostanci MC, 1999 | 43                        | 4                        | Vim thalamus  | 1-13 months           | Tremor grade<br>Grade 0: 60.5%<br>Grade 1: 13.9%                                                          |
| Zirh A, 1999        | 21                        | 2b                       | Vim thalamus  | 3, 12 months          | 90% improved<br>Overall: 13.4 to 4.5<br>Drawing: 6.3 to 2.9<br>Postural: 3.0 to 0.9<br>Action: 3.5 to 0.6 |
| Sobstyl M, 2006     | 9                         | 4                        | VL thalamus   | 24 months             | CRST:<br>Part B: 59%                                                                                      |



|                    |                                       |    |              |           |                                                                                        |
|--------------------|---------------------------------------|----|--------------|-----------|----------------------------------------------------------------------------------------|
|                    |                                       |    |              |           | Part C: 62%                                                                            |
| Niranjan A, 1999   | 39 total<br>13 RF                     | 4  | Vim thalamus |           | 5/13 Arrest<br>6/13 Significant<br>2/13 Partial                                        |
| Schuurman PR, 2000 | 68 total<br>45 PD<br>13 ET<br>10 MS   | 2b | Vim thalamus | 6 months  | Tremor grade<br>RF: 6/6 Grade 0<br>DBS: 7/7 Grade 0                                    |
| Pahwa R, 2001      | 34 total<br>17 RF<br>17 DBS           | 3a | Vim thalamus | 27 months | Tremor score<br>RF: 61.4 to 31.5<br>DBS: 61.6 to 30.5                                  |
| Schuurman PR, 2008 | 46 total<br>10 ET                     | 2b | Vim thalamus | 5 years   | Tremor grade<br>RF: 3 Grade 0, 1<br>grade 1<br>DBS: 3 Grade 0, 1<br>Grade 1, 2 grade 2 |
| Kim MJ, 2011       | 12 total                              | 4  | Vim thalamus | 6 months  | Tremor Score<br>58.8 to 30.9                                                           |
| Kim M, 2017        | 59 total<br>17 RF<br>19 DBS<br>23 FUS | 4  | Vim thalamus | 12 months | Tremor relief<br>RF: 70.6%<br>DBS: 84.2%<br>FUS: 78.3%                                 |

**Supplemental TABLE 4: Complications from RF thalamotomy**

| <b>Study</b>       | <b>Paresthesia</b>          | <b>Cerebellar/gait symptoms</b>                                        | <b>Hemiparesis</b>         | <b>Dysarthria</b>                    | <b>Other</b>                                                    |
|--------------------|-----------------------------|------------------------------------------------------------------------|----------------------------|--------------------------------------|-----------------------------------------------------------------|
| Schuurman PR, 2000 |                             | 1 Mild gait/balance disturbance                                        |                            | 1 Dysarthria                         | 1 Cognitive deterioration                                       |
| Pahwa R, 2001      | 1 Patient (6%)              |                                                                        | 2 (12%)                    |                                      | 1 Symptomatic ICH<br>5 ICH<br>5 Cognitive changes<br>7 Headache |
| Schuurman PR, 2008 |                             |                                                                        |                            | 1 Dysarthria                         | 1 Cognitive deterioration                                       |
| Kim MJ, 2011       |                             |                                                                        |                            | 1 Dysarthria                         |                                                                 |
| Nagaseki Y, 1986   | 1 Persistent                | 5 transient                                                            | 5 initial with improvement | 3 Dysarthria<br>2 lasting dysarthria |                                                                 |
| Mohadjer, 1990     |                             | 17% transient 'minor' cerebellar deficit<br>5% Persistent gait deficit |                            | 25% transient speech deficit         |                                                                 |
| Goldman MS, 1992   | 2 Transient                 |                                                                        |                            | 2 Persistent Dysarthria              | 1 Verbal cognitive deficit                                      |
| Jankovic J, 1995   |                             |                                                                        | 34%                        | Dysarthria 29%                       | Confusion 20%                                                   |
| Tasker RR, 1998    | 19 permanent<br>4 transient | 12 permanent<br>4 transient                                            | 15 hand ataxia             | 4 Permanent<br>8 transient           | 15% recurrence within 6                                         |

|                        |                            |                   |              |                                                         |                                                                                               |
|------------------------|----------------------------|-------------------|--------------|---------------------------------------------------------|-----------------------------------------------------------------------------------------------|
|                        |                            |                   |              |                                                         | months<br>4 ICH<br>4 Confusion                                                                |
| Akbostanci<br>MC, 1999 |                            |                   |              |                                                         | 5 Tremor<br>recurrence<br>6 permanent<br>speech/hemip<br>aresis                               |
| Zirh A, 1999           | 1 Permanent                | 1 Patient         |              | 1 Patient                                               |                                                                                               |
| Shahzadi,<br>1995      | 2 Persistent<br>3Transient | 1 Persistent gait | 1 Persistent | 1 Transient<br>dysarthria<br>1 Persistent<br>dysarthria | 1 ICH<br>1 Transient<br>cognitive<br>disturbance<br>4 procedures<br>repeated<br>9 recurrences |

**Supplemental TABLE 5: Studies reporting results of GKRS for ET**

| <b>Study</b>     | <b>Patients (N)</b> | <b>Level of Evidence</b> | <b>Target</b> | <b>Follow up time (months)</b> | <b>Tremor reduction (%)</b> |
|------------------|---------------------|--------------------------|---------------|--------------------------------|-----------------------------|
| Friedman, 1999   | 17                  | 4                        | Vim thalamus  | 3                              | 68                          |
| Lim, 2010        | 14                  | 2                        | Vim thalamus  | 7-30                           | 7                           |
| Young, 2010      | 119                 | 4                        | Vim thalamus  | 44                             | 40                          |
| Ohye, 2012       | 72                  | 4                        | Vim thalamus  | 24                             | 48                          |
| Witjas, 2015     | 50                  | 4                        | Vim thalamus  | 12                             | 54                          |
| Cho, 2015        | 7                   | 4                        | Vim thalamus  | 3-8                            | 44                          |
| Tuleasca, 2017   | 38                  | 4                        | Vim thalamus  | 12                             | 63                          |
| Niranjan, 2017   | 73                  | 4                        | Vim thalamus  | 28 (range 6-152)               | 68                          |
| Kondziolka, 2008 | 26                  | 4                        | Vim thalamus  | 36                             | 54                          |
| Kooshkabadi,     | 86                  | 4                        | Vim thalamus  | 23                             | 45                          |

**Supplemental TABLE 6: Studies reporting complications from GKRS for ET**

| <b>Study</b>     | <b>Paresthesia(%)</b> | <b>Gait/Ataxia(%)</b> | <b>Hemiparesis (%)</b> | <b>Dysarthria (%)</b> |
|------------------|-----------------------|-----------------------|------------------------|-----------------------|
| Friedman, 1999   | 0                     | 17                    | 8                      | 8                     |
| Lim, 2010        | 9                     | 0                     | 9                      | 9                     |
| Young, 2010      | 2                     | 0                     | 5                      | 3                     |
| Ohye, 2012       | 0                     | 0                     | 0                      | 0                     |
| Witjas, 2015     | 0                     | 0                     | 0                      | 0                     |
| Cho, 2015        | 0                     | 0                     | 0                      | 0                     |
| Tuleasca, 2017   | 0                     | 0                     | 0                      | 0                     |
| Niranjan, 2017   | 0                     | 0                     | 0                      | 0                     |
| Kondziolka, 2008 | 0                     | 0                     | 0                      | 0                     |
| Kooshkabadi,     | 1                     | 0                     | 1                      | 1                     |

**Supplemental TABLE 7: Studies reporting results of MRgFUS for ET**

| Study               | Patients             | Level of evidence | Target                                               | Followup                     | Tremor Reduction (CRST)                                                           | Quality of Life (QUEST)                                  |
|---------------------|----------------------|-------------------|------------------------------------------------------|------------------------------|-----------------------------------------------------------------------------------|----------------------------------------------------------|
| Lipsman et al. 2013 | 4                    | 4                 | Unilateral Vim                                       | 1, 3 mo                      | Hand score: 89.4% at 1 mo and 81.3% at 3 mo                                       | -                                                        |
| Elias et al. 2013   | 15                   | 4                 | Right Vim                                            | 1 d, 1 wk, 1 mo, 3 mo, 12 mo | Mean score: 79% at 3mo, 74.5% at 12 mo                                            | 37% vs 12% at 12 mo                                      |
| Chang et al. 2015   | 11                   | 4                 | Right Vim                                            | 1 wk, 1 mo, 3 mo, 6 mo       | CRST components: 5.1 to 1.4 (A) 13 to 2.6 (B) 13.5 to 2.8 (C) at 6 mo             | -                                                        |
| Elias et al. 2016   | 76 (56 FUS, 20 Sham) | 1b                | Right Vim                                            | 1, 3, 6, and 12 mo           | Mean score at 3 mo: 47% vs 0.1% (sham). At 12 mo: 35%, vs 2% (sham).              | 46% reduction of score at 3 mo, versus 3% (sham)         |
| Gallay et al. 2016  | 21                   | 4                 | Cerebell othalami c tract. Unilateral (18), Bilat(3) | 2 d, 3 mo, 1 yr              | Mean score: 55% ;57.6 ± 13.2 at baseline to 25.8 ± 17.6 at 1 yr.                  | -                                                        |
| Zaaroor et al. 2017 | 21 (18 ET, 3 ET-PD)  | 4                 | Unilateral Vim                                       | 1d, 1wk, 1-3mo , 6 mo        | Mean score decreased from 40.7 ± 11.6 to 9.3 ± 7.1 at 1mo, and to 8.2 +/-5 at 6mo | 44.8 ± 12.9 to 13.1 ± 13.2 at 1mo and 12.3 ± 7.2 at 6 mo |

|                     |    |   |             |                |                                                                                |   |
|---------------------|----|---|-------------|----------------|--------------------------------------------------------------------------------|---|
| Kim et al. 2017     | 23 | 4 | Right Vim   | 1wk, 1mo,12 mo | 18 patients (78.3%) met criteria for success at 12mo . 8 (34.8%) had remission | - |
| Federau et al. 2017 | 7  | 4 | Ventral VPL | 1 mo, 12 mo    | rel change: 58% ± 25% @ 1 mo, 55% ± 24% at 12 mo                               | - |

**Supplemental Table 8: Complications from MRgFUS for ET**

| <b>Study</b>        | <b>Paresthesia</b>                      | <b>Ataxia</b>                         | <b>Hemiparesis</b>                  | <b>Goal temperature not reached</b> | <b>Other</b>                  |
|---------------------|-----------------------------------------|---------------------------------------|-------------------------------------|-------------------------------------|-------------------------------|
| Lipsman et al. 2013 | 2 transient (50%), 1 persistent (25%)   | -                                     | -                                   | -                                   | 1 leg DVT (25%)               |
| Elias et al. 2013   | 14 transient (93%). 3 persistent (20%). | 4 transient (28%)                     | 1 transient (7%)                    | -                                   | 1 persistent dysesthesia (7%) |
| Chang et al. 2015   | -                                       | 1 transient (9%)                      | -                                   | 3 (27%)                             | -                             |
| Elias et al. 2016   | 13 transient (24%). 8 persistent (14%)  | 15 transient (27%), 5 persistent (9%) | 1 transient (2%), 1 persistent (2%) | 5 (9%)                              | 1 TIA (2%)                    |
| Gallay et al. 2016  | -                                       | 4 transient (19%), 1 persistent (5)   | -                                   | -                                   | -                             |
| Zaaroor et al. 2017 | -                                       | 4 transient                           | -                                   | -                                   | -                             |
| Kim et al. 2017     | -                                       | 1 transient (4%)                      | 1 facial persistent (4%)            | -                                   | 1 transient hypogeusia (4%)   |
